# Supplementary material
Source: Springer Nature journal article supplement (https://www.springermedizin.de/resource/supplementary/13014_2006_46_MOESM5_ESM.pdf/9632796)

# Percentage tumor coverage vs volume

$$\% \text{ tumor coverage} = 95.5292 - 0.0179 * \text{volume}$$

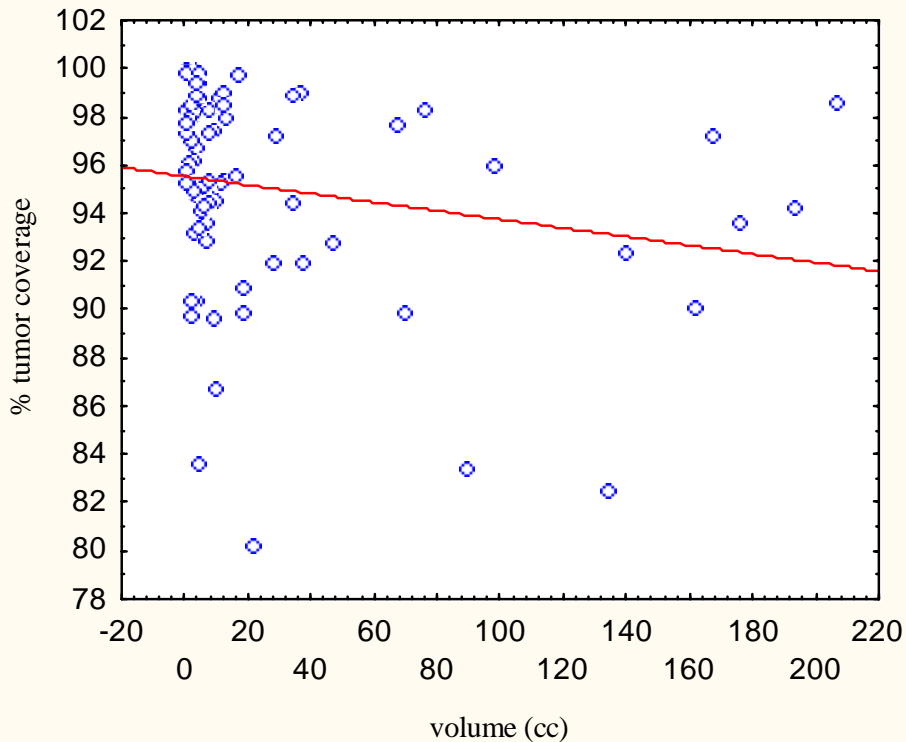

Supplement: MOESM5 [file 9632796]
